# Supplementary material
Source: publisher site journal article supplement (https://www.dovepress.com/article/supplementary_file/621042/621042%20Supplementary%20Material.docx)
Supplement: Supplementary file 1 [file 621042%20Supplementary%20Material.docx]

**Table S1.** Knowledge dimension score distribution

| Items | Options, n (%) | | | | | | |
| --- | --- | --- | --- | --- | --- | --- | --- |
| 1. Nature of hypertension: | a. Infectious diseases | b. Communicable diseases | c. Chronic non-communicable diseases (correct) |
|  | 18 (3.2) | 7 (1.2) | 536 (95.5) |
| 2. Definition of hypertension: | a. Systolic blood pressure ≥140 mmHg and/or diastolic blood pressure ≥90 mmHg (correct) | b. Systolic blood pressure ≥130 mmHg and/or diastolic blood pressure ≥80 mmHg | c. Systolic blood pressure ≥120 mmHg and/or diastolic blood pressure ≥80 mmHg | d. Systolic blood pressure ≥115 mmHg and/or diastolic blood pressure ≥75 mmHg |
|  | 405 (72.2) | 72 (12.8) | 63 (11.2) | 21 (3.7) |
| 3. Classification of hypertension: | a. Mild hypertension, moderate hypertension, severe hypertension (correct) | b. First-degree hypertension, second-degree hypertension, third-degree hypertension | c. Stage 1 hypertension, stage 2 hypertension, stage 3 hypertension | d. Primary hypertension, secondary hypertension, masked hypertension, complicated hypertension |
|  | 363 (64.7) | 43 (7.7) | 103 (18.4) | 52 (9.3) |
| 4. Most common major symptoms of hypertension: | a. Thirst | b. Dizziness and headache (correct) | c. Facial flushing | d. Weight loss | e. No symptoms | | |
|  | 60 (10.7) | 404 (72.0) | 34 (6.1) | 20 (3.6) | 43 (7.7) | | |
| 5. Significant risk factors for hypertension: | a. High-sodium, low-potassium diet | b. Overweight and obesity | c. Smoking and excessive alcohol consumption | d. Prolonged mental stress (correct) | e. Genetic factors (correct) | | |
|  | 365 (65.1) | 382 (68.1) | 335 (59.7) | 387 (69.0) | 387 (69.0) | | |
| 6. Harmful effects of chronic hypertension on the body: | a. Increases the risk of cardiovascular disease (correct) | b. Leads to kidney damage | c. Increases the risk of stroke | d. Leads to retinal changes | e. Increases the risk of cognitive impairment | | |
|  | 501 (89.3) | 266 (47.4) | 472 (84.1) | 274 (48.8) | 255 (45.5) | | | |
| 7. How should hypertension patients adjust their diet? | a. Reducing saturated fat and cholesterol intake (correct) | b. Reducing potassium intake | c. Increasing sodium intake | d. Increasing sugar intake |
|  | 414 (73.8) | 55 (9.8) | 55 (9.8) | 37 (6.6) |
| 8. Fundamental goal of treating older adults with hypertension: | a. Restore blood pressure to the normal range | b. Lower blood pressure to below 140/90 mmHg (correct) | c. Reduce the overall risk of cardiovascular and cerebrovascular complications and mortality | d. Lower blood pressure to below 130/80 mmHg |
|  | 121 (21.6) | 242 (43.1) | 152 (27.1) | 46 (8.2) |
| 9. Beneficial lifestyle changes for hypertension do not include: | a. Reducing sodium intake and increasing potassium intake | b. Weight control | c. Not smoking and limiting alcohol consumption | d. Intense physical activity (correct) | e. Psychological balance | f. Managing sleep | | | | |
|  | 117 (20.9) | 64 (11.4) | 52 (9.3) | 196 (34.9) | 70 (12.5) | 62(11.1) | | | | |
| 10. Which is not a basic principle for antihypertensive drug use in older adults: | a. Initiate with low doses | b. Long-acting antihypertensive drugs | c. Combination therapy | d. Rapid (correct) | e. Individualized treatment | f. Reduce risk | | | | |
|  | 40 (7.1) | 43 (7.7) | 41 (7.3) | 366 (65.2) | 44 (7.8) | 27(4.8) | | | | |
| 11. Common antihypertensive drugs include: | a. Beta-blockers (e.g., metoprolol) (correct) | b. Diuretics (e.g., hydrochlorothiazide) | c. Calcium channel blockers (e.g., amlodipine) | d. ACE inhibitors/ARBs (e.g., losartan) | e. ARNI (e.g., sacubitril/valsartan) | | | | |
|  | 396 (70.6) | 285 (50.8) | 395 (70.4) | 390(69.5) | 261(46.5) | | | | |
| 12. Mechanism of action of antihypertensive drugs: | a. Vasodilation | b. Decrease in cardiac load (correct) | c. Increased urine output | d. Reduction of the effects of angiotensin |
|  | 454 (80.9) | 491 (87.5) | 305 (54.4) | 392 (69.9) |
| 13. What should hypertension patients pay attention to when using medications? | a. Take medication as prescribed by the doctor | b. Avoid suddenly discontinuing medication | c. Regularly monitor blood pressure (correct) | d. Monitor blood routine and liver function, among other indicators | e. Do not replace or adjust the medication regimen | |
|  | 467 (83.2) | 466 (83.1) | 516 (92.0) | 298 (53.1) | 184 (32.8) | |
| 14. Common side effects of antihypertensive drugs: | a. Cough | b. Lower limb edema | c. Bradycardia (slower heart rate) (correct) | d. Electrolyte imbalance | e. Constipation | |
|  | 216 (38.5) | 321 (57.2) | 353 (62.9) | 248(44.2) | 283(50.4) | |
| 15. For hypertensive older adult patients whose blood pressure is not controlled with single-drug therapy, they can typically choose: | a. Combination therapy with drugs that complement the mechanism (correct) | b. Combination therapy with drugs that have a similar mechanism of action | c. Monotherapy with fixed-dose combinations (i.e., a single medication containing two or more individual components of antihypertensive drugs) |
|  | 469 (83.6) | 277 (49.4) | 331 (59.0) |

**Table S2.** Univariable and multivariable analyses of knowledge

| Cut-off value: ≥24/<24 | No. | Univariable | | Multivariable (forward selection, P<0.1) | |
| --- | --- | --- | --- | --- | --- |
| OR (95%CI) | P | OR (95%CI) | P |
| Gender |  |  |  |  |  |
| Male | 132/248 | ref. |  |  |  |
| Female | 199/313 | 1.534 (1.092,2.154) | 0.013 |  |  |
| Age |  |  |  |  |  |
| 65-79 years | 183/333 | ref. |  |  |  |
| 80 years and above | 148/228 | 1.516 (1.072,2.146) | 0.019 |  |  |
| Marital status [adjusted] |  |  |  |  |  |
| Married | 275/419 | ref. |  | ref. |  |
| Other | 56/142 | 0.341 (0.230,0.505) | <0.001 | 0.564 (0.343,0.925) | 0.023 |
| Education level |  |  |  |  |  |
| Junior high school and below | 67/182 | ref. |  |  |  |
| High school or vocational school | 177/246 | 4.403 (2.922,6.635) | <0.001 |  |  |
| College and above | 87/133 | 3.246 (2.034,5.180) | <0.001 |  |  |
| Residential area |  |  |  |  |  |
| Local urban area | 325/515 | ref. |  | ref. |  |
| Local rural area | 6/46 | 0.088 (0.036,0.211) | <0.001 | 0.290 (0.111,0.757) | 0.011 |
| Medical payment method [adjusted] |  |  |  |  |  |
| Urban employee medical insurance | 299/436 | ref. |  | ref. |  |
| Other | 32/125 | 0.158 (0.101,0.247) | <0.001 | 0.558 (0.322,0.969) | 0.038 |
| Occupation |  |  |  |  |  |
| Farmers | 7/48 | 0.118 (0.049,0.281) | <0.001 | 0.244 (0.095,0.629) | 0.004 |
| Workers | 27/105 | 0.239 (0.138,0.415) | <0.001 | 0.442 (0.238,0.821) | 0.010 |
| Cadres | 213/266 | 2.775 (1.769,4.352) | <0.001 | 1.623 (0.984,2.674) | 0.058 |
| Other | 84/142 | ref. |  | ref. |  |
| Monthly income (RMB) [adjusted] |  |  |  |  |  |
| ≤8000 | 126/292 | ref. |  | ref. |  |
| >8000 | 205/269 | 4.220 (2.933,6.072) | <0.001 | 1.744 (1.111,2.736) | 0.016 |
| Duration of Hypertension |  |  |  |  |  |
| <5 years | 64/142 | ref. |  |  |  |
| 6-10 years | 43/125 | 0.639 (0.389,1.049) | 0.077 |  |  |
| >11 years | 224/294 | 3.900 (2.548,5.970) | <0.001 |  |  |
| Duration of taking antihypertensive medications |  |  |  |  |  |
| <5 years | 78/177 | ref. |  | ref. |  |
| 6-10 years | 47/115 | 0.877 (0.545,1.412) | 0.590 | 1.126 (0.644,1.969) | 0.676 |
| >11 years | 206/269 | 4.150 (2.756,6.250) | <0.001 | 1.899 (1.142,3.159) | 0.013 |
| Different hypertension medications used |  |  |  |  |  |
| Have hypertension but no medication | 0/1 | / | / |  |  |
| 1 type | 84/162 | 0.571 (0.374,0.870) | 0.009 |  |  |
| 2 types | 113/193 | 0.748 (0.499,1.123) | 0.162 |  |  |
| 3 types or more | 134/205 | ref. |  |  |  |
| Current types of antihypertensive medications |  |  |  |  |  |
| Have hypertension but no medication | 0/1 | / | / |  |  |
| 1 type | 163/258 | 3.341 (1.819,6.139) | <0.001 |  |  |
| 2 types | 149/246 | 2.991 (1.626,5.502) | <0.001 |  |  |
| 3 types or more | 19/56 | ref. |  |  |  |
| Received medication education |  |  |  |  |  |
| Yes | 288/427 | ref. |  | ref. |  |
| No | 43/134 | 0.228 (0.151,0.345) | <0.001 | 0.505 (0.303,0.843) | 0.009 |
| Have a family doctor |  |  |  |  |  |
| Yes | 302/450 | ref. |  |  |  |
| No | 29/111 | 0.173 (0.109,0.276) | <0.001 |  |  |

**Table S3.** Univariable and multivariable analyses of attitude

| Cut-off value: ≥23/<23 | No. | Univariable | | Multivariable (forward selection, P<0.1） | |
| --- | --- | --- | --- | --- | --- |
| OR (95%CI) | P | OR (95%CI) | P |
| Gender |  |  |  |  |  |
| Male | 117/248 | ref. |  |  |  |
| Female | 186/313 | 1.640 (1.172,2.295) | 0.004 |  |  |
| Age |  |  |  |  |  |
| 65-79 years | 158/333 | ref. |  |  |  |
| 80 years and above | 145/228 | 1.935 (1.370,2.732) | <0.001 |  |  |
| Marital status [adjusted] |  |  |  |  |  |
| Married | 259/419 | ref. |  |  |  |
| Other | 44/142 | 0.277 (0.185,0.417) | <0.001 |  |  |
| Education level |  |  |  |  |  |
| Junior high school and below | 43/182 | ref. |  | ref. |  |
| High school or vocational school | 188/246 | 10.478 (6.673,16.453) | <0.001 | 3.067 (1.641,5.730) | <0.001 |
| College and above | 72/133 | 3.815 (2.354,6.185) | <0.001 | 1.036 (0.555,1.934) | 0.912 |
| Residential area |  |  |  |  |  |
| Local urban area | 303/515 | ref. |  |  |  |
| Local rural area | 0/46 | / | / |  |  |
| Medical payment method [adjusted] |  |  |  |  |  |
| Urban employee medical insurance | 287/436 | ref. |  | ref. |  |
| Other | 16/125 | 0.076 (0.043,0.134) | <0.001 | 0.320 (0.161,0.635) | 0.001 |
| Occupation |  |  |  |  |  |
| Farmers | 0/48 | / | / |  |  |
| Workers | 15/105 | 0.162 (0.086,0.307) | <0.001 | 0.480 (0.224,1.032) | 0.060 |
| Cadres | 216/266 | 4.200 (2.677,6.589) | <0.001 | 1.608 (0.922,2.804) | 0.094 |
| Other | 72/142 | ref. |  | ref. |  |
| Monthly income (RMB) [adjusted] |  |  |  |  |  |
| ≤8000 | 99/292 | ref. |  | ref. |  |
| >8000 | 204/269 | 6.118 (4.228,8.855) | <0.001 | 2.034 (1.221,3.388) | 0.006 |
| Duration of Hypertension |  |  |  |  |  |
| <5 years | 41/142 | ref. |  | ref. |  |
| 6-10 years | 23/125 | 0.555 (0.311,0.992) | 0.047 | 0.964 (0.480,1.936) | 0.917 |
| >11 years | 239/294 | 10.705 (6.714,17.068) | <0.001 | 3.983 (2.217,7.154) | <0.001 |
| Duration of taking antihypertensive medications |  |  |  |  |  |
| <5 years | 60/177 | ref. |  |  |  |
| 6-10 years | 38/115 | 0.962 (0.585,1.583) | 0.880 |  |  |
| >11 years | 205/269 | 6.246 (4.108,9.497) | <0.001 |  |  |
| Different hypertension medications used |  |  |  |  |  |
| Have hypertension but no medication | 0/1 | / | / |  |  |
| 1 type | 65/162 | 0.412 (0.270,0.628) | <0.001 |  |  |
| 2 types | 111/193 | 0.831 (0.557,1.242) | 0.367 |  |  |
| 3 types or more | 127/205 | ref. |  |  |  |
| Current types of antihypertensive medications |  |  |  |  |  |
| Have hypertension but no medication | 0/1 | / | / |  |  |
| 1 type | 140/258 | 2.966 (1.581,5.566) | <0.001 |  |  |
| 2 types | 147/246 | 3.712 (1.971,6.993) | <0.001 |  |  |
| 3 types or more | 16/56 | ref. |  |  |  |
| Received medication education |  |  |  |  |  |
| Yes | 274/427 | ref. |  | ref. |  |
| No | 29/134 | 0.154 (0.098,0.243) | <0.001 | 0.412 (0.229,0.742) | 0.003 |
| Have a family doctor |  |  |  |  |  |
| Yes | 280/450 | ref. |  |  |  |
| No | 23/111 | 0.159 (0.097,0.261) | <0.001 |  |  |
| Knowledge Score |  |  |  |  |  |
| <24 | 58/230 | ref. |  | ref. |  |
| ≥24 | 245/331 | 8.448 (5.744,12.427) | <0.001 | 2.450 (1.445,4.156) | 0.001 |

**Table S4.** Univariable and multivariable analyses of practice

| Cut-off value：≥33/＜33 | No. | Univariable | | Multivariable (forward selection, P<0.1) | |
| --- | --- | --- | --- | --- | --- |
| OR (95%CI) | P | OR (95%CI) | P |
| Gender |  |  |  |  |  |
| Male | 117/248 | ref. |  |  |  |
| Female | 186/313 | 1.640 (1.172,2.295) | 0.004 |  |  |
| Age |  |  |  |  |  |
| 65-79 years | 160/333 | ref. |  |  |  |
| 80 years and above | 143/228 | 1.819 (1.290,2.566) | 0.001 |  |  |
| Marital status [adjusted] |  |  |  |  |  |
| Married | 270/419 | ref. |  | ref. |  |
| Other | 33/142 | 0.167 (0.108,0.259) | <0.001 | 0.447 (0.227,0.881) | 0.020 |
| Education level |  |  |  |  |  |
| Junior high school and below | 43/182 | ref. |  |  |  |
| High school or vocational school | 180/246 | 8.816 (5.659,13.734) | <0.001 |  |  |
| College and above | 80/133 | 4.879 (2.997,7.943) | <0.001 |  |  |
| Residential area |  |  |  |  |  |
| Local urban area | 303/515 | ref. |  |  |  |
| Local rural area | 0/46 | / | / |  |  |
| Medical payment method [adjusted] |  |  |  |  |  |
| Urban employee medical insurance | 293/436 | ref. |  | ref. |  |
| Other | 10/125 | 0.042 (0.022,0.083) | <0.001 | 0.351 (0.143,0.861) | 0.022 |
| Occupation |  |  |  |  |  |
| Farmers | 0/48 | / | / | / | / |
| Workers | 7/105 | 0.057 (0.025,0.131) | <0.001 | 0.217 (0.080,0.592) | 0.003 |
| Cadres | 217/266 | 3.532 (2.244,5.558) | <0.001 | 1.142 (0.596,2.189) | 0.689 |
| Other | 79/142 | ref. |  |  |  |
| Monthly income (RMB) [adjusted] |  |  |  |  |  |
| ≤8000 | 97/292 | ref. |  | ref. |  |
| >8000 | 206/269 | 6.573 (4.528,9.543) | <0.001 | 2.317 (1.256,4.271) | 0.007 |
| Duration of Hypertension |  |  |  |  |  |
| <5 years | 42/142 | ref. |  |  |  |
| 6-10 years | 23/125 | 0.537 (0.301,0.957) | 0.035 |  |  |
| >11 years | 238/294 | 10.119 (6.367,16.082) | <0.001 |  |  |
| Duration of taking antihypertensive medications |  |  |  |  |  |
| <5 years | 69/177 | ref. |  | ref. |  |
| 6-10 years | 25/115 | 0.435 (0.254,0.743) | 0.002 | 0.288 (0.126,0.657) | 0.003 |
| >11 years | 209/269 | 5.452 (3.594,8.271) | <0.001 | 1.141 (0.564,2.305) | 0.714 |
| Different hypertension medications used |  |  |  |  |  |
| Have hypertension but no medication | 0/1 | / | / |  |  |
| 1 type | 64/162 | 0.401 (0.263,0.612) | <0.001 |  |  |
| 2 types | 112/193 | 0.849 (0.568,1.269) | 0.425 |  |  |
| 3 types or more | 127/205 | ref. |  |  |  |
| Current types of antihypertensive medications |  |  |  |  |  |
| Have hypertension but no medication | 0/1 | / | / | / | / |
| 1 type | 153/258 | 12.143 (5.024,29.348) | <0.001 | 5.512 (1.694,17.939) | 0.005 |
| 2 types | 144/246 | 11.765 (4.860,28.476) | <0.001 | 3.947 (1.216,12.816) | 0.022 |
| 3 types or more | 6/56 | ref. |  |  |  |
| Received medication education |  |  |  |  |  |
| Yes | 279/427 | ref. |  |  |  |
| No | 24/134 | 0.116 (0.071,0.188) | <0.001 |  |  |
| Have a family doctor |  |  |  |  |  |
| Yes | 292/450 | ref. |  | ref. |  |
| No | 11/111 | 0.060 (0.031,0.114) | <0.001 | 0.257 (0.107,0.616) | 0.002 |
| Knowledge Score |  |  |  |  |  |
| <24 | 50/230 | ref. |  | ref. |  |
| ≥24 | 253/331 | 11.677 (7.802,17.476) | <0.001 | 2.878 (1.546,5.359) | 0.001 |
| Attitude Score |  |  |  |  |  |
| <23 | 47/258 | ref. |  | ref. |  |
| ≥23 | 256/303 | 24.453 (15.694,38.100) | <0.001 | 5.945 (3.182,11.108) | <0.001 |


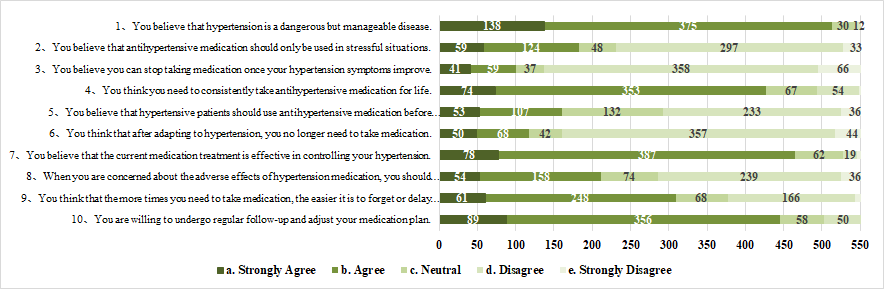


**Figure S1.** Distribution of the attitude dimension scores


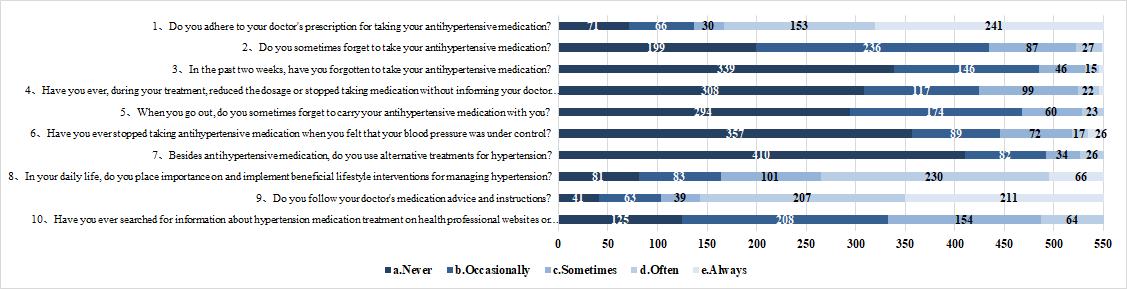


**Figure S2.** Distribution of the practice dimension scores
